# Supplementary material for: Highly efficient visible-light-driven plasmonic photocatalysts based on graphene oxide mediated hybridization of graphite and Ag/AgBr
Source: Royal Society of Chemistry journal article supplement (doi:10.1039/c6ra27462e), 2017-01-01
Supplement: c6ra27462e1.pdf [file c6ra27462e1.pdf]

## Electronic Supplementary Information

### Highly Efficient Visible-Light-Driven Plasmonic Photocatalysts based on Graphene Oxide Mediated Hybridization of Graphite and Ag/AgBr

Guangwei Geng,<sup>a,b</sup> Bo Guan,<sup>b</sup> Penglei Chen,<sup>\*a,b,c</sup> Mingshan Zhu,<sup>b</sup> Changchun Yang,<sup>a</sup> Minghua Liu<sup>b,c</sup>

<sup>a</sup>College of Chemistry and Molecular Engineering, Zhengzhou University, 100 Science Road, Henan, Zhengzhou 450001, China.

<sup>b</sup>Beijing National Laboratory for Molecular Science, Institute of Chemistry, Chinese Academy of Sciences, No. 2 Zhongguancun Beiyijie, Beijing 100190, China. E-mail: [chenpl@iccas.ac.cn](mailto:chenpl@iccas.ac.cn)

<sup>c</sup>University of Chinese Academy of Sciences, Beijing 100049, China.

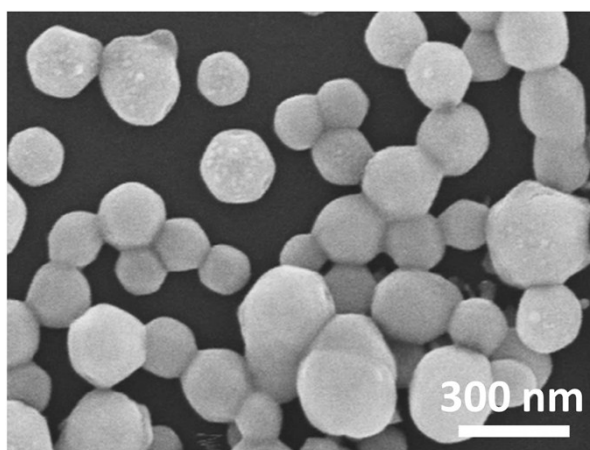

Fig. S1 The typical SEM image of the Ag/AgBr structures.

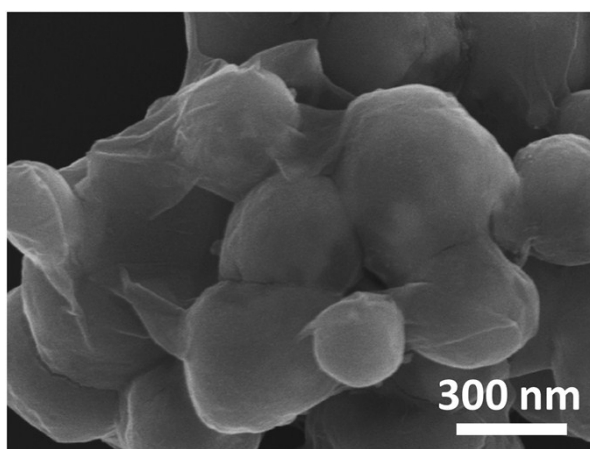

Fig. S2 The typical SEM image of the GO/Ag/AgBr structures.

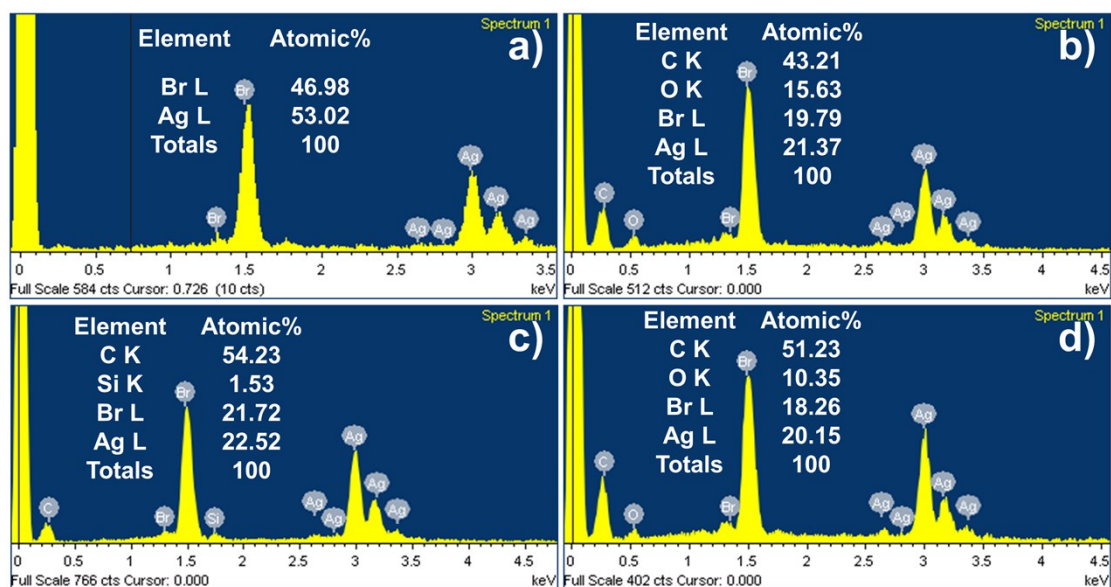

**Fig. S3** The EDX elemental analysis of our Ag/AgBr (a), GO/Ag/AgBr (b), Gr/Ag/AgBr (c) and Gr/GO/Ag/AgBr (d) structures. The semiquantitative elemental analysis results for each sample are listed in the corresponding panels. The signals ascribing to Si element could also be detected in some cases, since Si plates were used as the solid support for the measurements.

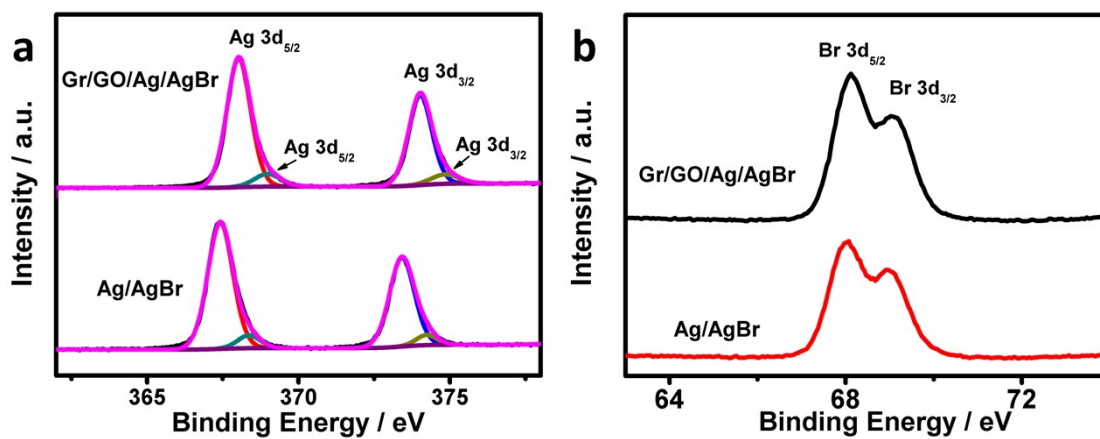

**Fig. S4** Typical XPS spectra of Ag 3d (a) and Br 3d (b) of our Ag/AgBr and Gr/GO/Ag/AgBr structures.
